# Supplementary material for: Integrated genomic characterization of oesophageal carcinoma
Source: Nature. Author manuscript; Available in PMC 2017 Oct 22. (PMC5651175; doi:10.1038/nature20805)
Supplement: Supp Table 6 [file NIHMS905030-supplement-Supp_Table_6.xlsx]

## Sheet: 20160322_epigenetic.silencing.C
Supplemental Table 6
Gene	% cases silenced in cluster1	% cases silenced in other clusters	Difference in proportions	P value (Fisher's exact test )	Adjusted P value (Benjamini-Hochberg)
ZNF141	84	17.4312	66.5688	5.29999e-19	5.03499e-17
C16orf5	72	10.0917	61.9083	2.20386e-18	1.04683e-16
CDKN2A	74	11.9266	62.0734	7.23479e-18	1.95441e-16
ZNF675	81.25	16.2037	65.0463	8.22908e-18	1.95441e-16
PPP1R9A	68	12.3853	55.6147	7.94242e-15	1.25755e-13
ZNF559	76	17.8899	58.1101	7.92051e-15	1.25755e-13
CPPED1	48	3.21101	44.789	1.41588e-14	1.92156e-13
RNF130	56	6.88073	49.1193	4.34565e-14	5.16046e-13
ZNF350	77.551	20.1835	57.3675	4.97922e-14	5.25584e-13
C10orf35	34	0.458716	33.5413	4.88479e-13	4.64055e-12
ZNF134	78	24.7706	53.2294	3.63152e-12	3.13631e-11
ZNF254	70	19.2661	50.7339	1.24444e-11	9.85179e-11
FAM117A	44	4.58716	39.4128	1.84029e-11	1.34483e-10
KRBA1	74	23.3945	50.6055	3.26427e-11	2.21504e-10
FAM200A	32	1.37615	30.6239	1.47861e-10	9.36453e-10
ZNF558	44	6.42202	37.578	6.68521e-10	3.96934e-09
ZFP3	66	20.1835	45.8165	9.12757e-10	5.1007e-09
MLF1	88	41.7431	46.2569	1.32888e-09	7.01354e-09
DUSP23	34	3.21101	30.789	4.19737e-09	2.09869e-08
ZNF613	40	5.9633	34.0367	7.30495e-09	3.46985e-08
MGMT	62	19.7248	42.2752	1.18605e-08	5.36545e-08
CHFR	64	21.1009	42.8991	1.38706e-08	5.98959e-08
AGK	26	1.37615	24.6239	2.92456e-08	1.20797e-07
ATP6V0E2	46	10.6481	35.3519	6.89597e-08	2.53383e-07
THNSL2	78	35.7798	42.2202	6.93469e-08	2.53383e-07
TTC14	28	2.29358	25.7064	6.66923e-08	2.53383e-07
ALKBH3	44	9.63303	34.367	7.81633e-08	2.75019e-07
ZNF43	98	63.7615	34.2385	8.34777e-08	2.83228e-07
ZNF605	42	9.17431	32.8257	1.79303e-07	5.87373e-07
ZNF160	52	15.5963	36.4037	2.28077e-07	7.22244e-07
TSPYL5	100	71.1009	28.8991	4.38588e-07	1.34406e-06
ZNF268	28	3.21101	24.789	4.9964e-07	1.48331e-06
RPL39L	52	16.5138	35.4862	9.29875e-07	2.67691e-06
LINC00526	30	4.58716	25.4128	1.32472e-06	3.59566e-06
ZNF808	30	4.58716	25.4128	1.32472e-06	3.59566e-06
LOC148189	40	10.0917	29.9083	2.02102e-06	5.33325e-06
C3orf14	92	59.1743	32.8257	2.66274e-06	6.60994e-06
LDHB	44	12.844	31.156	2.71356e-06	6.60994e-06
ZNF253	28	4.12844	23.8716	2.62583e-06	6.60994e-06
CD81	36	8.25688	27.7431	3.35225e-06	7.96158e-06
DEM1	20	1.37615	18.6239	4.18655e-06	9.70054e-06
RRAS2	38	9.63303	28.367	4.40017e-06	9.95276e-06
ZNF14	30	5.50459	24.4954	5.28409e-06	1.16741e-05
LOC339803	84	50	34	7.11624e-06	1.53646e-05
NUDT7	28	5.04587	22.9541	1.06913e-05	2.24666e-05
ZSCAN18	98	72.0183	25.9817	1.08786e-05	2.24666e-05
ZNF419	34	8.25688	25.7431	1.20127e-05	2.42811e-05
RAB32	60	27.5229	32.4771	2.38045e-05	4.71131e-05
ZNF549	76	43.1193	32.8807	3.30549e-05	6.40861e-05
ZNF830	22	3.21101	18.789	3.96475e-05	7.53303e-05
ZNF542	100	79.3578	20.6422	7.61234e-05	0.000141799
PRMT6	38	12.844	25.156	0.000110144	0.000201225
RPP30	18	2.75229	15.2477	0.000289365	0.000490887
SNX19	22	4.60829	17.3917	0.000287882	0.000490887
ZNF468	18	2.75229	15.2477	0.000289365	0.000490887
NUP210	38	14.2202	23.7798	0.000408242	0.000680404
C10orf47	16	2.29358	13.7064	0.000534828	0.000876012
ZNF816	18	3.21101	14.789	0.000566248	0.000911756
ZNF304	14	2.29358	11.7064	0.00199335	0.00315614
ZNF486	76	51.8349	24.1651	0.00243218	0.00378782
IRS2	22	6.88073	15.1193	0.00281575	0.00431445
ZNF140	16	3.66972	12.3303	0.00334827	0.00504897
ZNF655	64	40.8257	23.1743	0.00427379	0.0063439
NSUN7	18	5.04587	12.9541	0.00445631	0.00651307
REC8	96	80.2752	15.7248	0.00565591	0.00814108
SDR42E1	48	27.5229	20.4771	0.00668916	0.00948463
